# Supplementary material for: Insecticide Resistance Profiling of Anopheles coluzzii and Anopheles gambiae Populations in the Southern Senegal: Role of Target Sites and Metabolic Resistance Mechanisms
Source: PubMed Central journal article supplement (PMC7760107; doi:10.3390/genes11121403), 2020-11-25
Supplement: genes-11-01403-s001.pdf [file genes-11-01403-s001.pdf]

**Table S1.** Species composition of the *An. gambiae s.l* collected indoor.

| Year | Locality    | Proportion of the different species of <i>An. gambiae</i> complex |                  |                         | N   | Proportion of the incipient species of <i>An. gambiae</i> s.s. |                    |                                 | N   |
|------|-------------|-------------------------------------------------------------------|------------------|-------------------------|-----|----------------------------------------------------------------|--------------------|---------------------------------|-----|
|      |             | <i>An. arabiensis</i>                                             | <i>An. melas</i> | <i>An. gambiae</i> s.s. |     | <i>An. coluzzii</i>                                            | <i>An. gambiae</i> | <i>An. coluzzii/An. gambiae</i> |     |
| 2017 | Kedougou    | 36 (16.36%)                                                       | -                | 184 (83.64%)            | 220 | 9 (4.92%)                                                      | 172 (93.99%)       | 3 (1.64%)                       | 184 |
|      | Tambacounda | 68 (28.94%)                                                       | -                | 167 (71.06%)            | 235 | 14 (8.28%)                                                     | 148 (87.57%)       | 5 (2.96%)                       | 167 |
|      | Fatick      | 165 (81.68%)                                                      | 9 (4.46%)        | 28 (13.86%)             | 202 | 19 (67.85%)                                                    | 8 (28.57%)         | 1 (3.57%)                       | 28  |
| 2018 | Kedougou    | 10 (7.46%)                                                        | -                | 124 (92.54%)            | 134 | 12 (9.68%)                                                     | 112 (90.32%)       | -                               | 124 |
|      | Tambacounda | 79 (15.64%)                                                       | -                | 426 (84.36%)            | 505 | 99 (23.23%)                                                    | 313 (73.47%)       | 14 (3.29%)                      | 426 |
|      | Fatick      | 116 (65.17%)                                                      | 1 (0.56%)        | 61 (34.27%)             | 178 | 54 (88.52%)                                                    | 6 (9.84%)          | 1 (1.64%)                       | 61  |

Abbreviations: N total number of specimens collected; *An. coluzzii/An. gambiae* hybrid obtained after molecular identification by PCR.

**Table S2:** Species composition of adult from Larvae collection.

| Locality           | Proportion of the different species of <i>An. gambiae</i> complex |                    |            | Proportion of the incipient species of <i>An. gambiae</i> |                    |                                 | N          |
|--------------------|-------------------------------------------------------------------|--------------------|------------|-----------------------------------------------------------|--------------------|---------------------------------|------------|
|                    | <i>An. arabiensis</i>                                             | <i>An. gambiae</i> | N          | <i>An. coluzzii</i>                                       | <i>An. gambiae</i> | <i>An. coluzzii/An. gambiae</i> |            |
| <b>Kedougou</b>    | 38 (8.05%)                                                        | 434 (91.95%)       | <b>472</b> | 53 (12.21%)                                               | 376 (86.64%)       | 5 (1.15%)                       | <b>434</b> |
| <b>Tambacounda</b> | 185 (47.80%)                                                      | 202 (52.20%)       | <b>387</b> | 101 (50%)                                                 | 95 (47.03%)        | 6 (2.97%)                       | <b>202</b> |
| <b>Fatick</b>      | 199 (85.78%)                                                      | 33 (14.22%)        | <b>232</b> | 5 (15.15%)                                                | 28 (84.85%)        | -                               | <b>33</b>  |

*Abbreviations: N total number of specimens collected; An. coluzzii/An. gambiae hybrid obtained after molecular identification by PCR.*

**Table S3.** Genetic diversity parameter of voltage gate sodium channel gene.

|                              | <b>2N</b> | <b>S</b> | <b>h</b> | <b>Hd</b> | <b><math>\pi</math></b> | <b>D</b>             | <b>D*</b>            |
|------------------------------|-----------|----------|----------|-----------|-------------------------|----------------------|----------------------|
| Kedougou <i>An. coluzzii</i> | 12        | 3        | 2        | 0.409     | 0.002                   | 0.77                 | 1.105                |
| Kedougou <i>An. gambiae</i>  | 24        | 0        | 1        | 0         | 0.000                   | /                    | /                    |
| Kedougou Hybride             | 8         | 1        | 2        | 0.25      | 0.001                   | -1.31 <sup>ns</sup>  | -1.41 <sup>ns</sup>  |
| Tamba <i>An. coluzzii</i>    | 22        | 3        | 3        | 0,498     | 0.002                   | 1.427 <sup>ns</sup>  | 0.991 <sup>ns</sup>  |
| Tamba <i>An. gambiae</i>     | 24        | 0        | 1        | 0         | 0.000                   | /                    | /                    |
| Tamba Hybride                | 8         | 0        | 1        | 0.000     | 0.000                   | /                    | /                    |
| Total                        | 98        | 5        | 4        | 0.219     | 0.001                   | -0.804 <sup>ns</sup> | -1.088 <sup>ns</sup> |

*Abbreviations:* 2N, number of sequences; S, number of polymorphic sites; h, haplotype; Hd, haplotype diversity;  $\pi$ , nucleotide diversity; D, Tajima's statistic; D\*, Fu and Li's statistic; ns, not significant
